# Supplementary material for: Achieving a low electrical percolation threshold and superior mechanical performance in poly(l-lactide)/thermoplastic polyurethane/carbon nanotubes composites via tailoring phase morphology with the aid of stereocomplex crystallites
Source: Royal Society of Chemistry journal article supplement (doi:10.1039/c6ra27401c), 2017-01-01
Supplement: c6ra27401c1.pdf [file c6ra27401c1.pdf]

## Supporting Information

**Achieving low electrical percolation threshold and superior mechanical performance in poly(L-lactide)/thermoplastic polyurethane/carbon nanotubes composites via tailoring phase morphology with the aid of stereocomplex crystallites**

Zhenwei Liu, Hongwei Bai\*, Yuanlin Luo, Qin Zhang, Qiang Fu\*

College of Polymer Science and Engineering, State Key Laboratory of Polymer

Materials Engineering, Sichuan University, Chengdu 610065, China

\*Corresponding author.

Tel./Fax: +86 28 8546 1795. E-mail: bhw\_168@163.com, hongweibai@scu.edu.cn

(H.W. Bai); qiangfu@scu.edu.cn (Q. Fu).

**Detailed fitting procedure used to obtain the parameters of percolation threshold ( $\varphi_c$ ), scaling factor ( $\sigma_0$ ), and percolation exponent ( $t$ ) is described as following:**

Taking PLLA/TPU-1.5CNTs composites as an example, the experimental data shown in Figure 6 was fitted using the classical percolation scaling law above the  $\varphi_c$  :

$$\sigma = \sigma_0(\varphi - \varphi_c)^t$$

According to the scaling law, we can get one formula:

$$\log \sigma = \log \sigma_0 + t \log(\varphi - \varphi_c)$$

The plot of  $\log \sigma$  versus  $\log(\varphi - \varphi_c)$  was fitted by varying the value of  $\varphi_c$  from 0.30 wt% to 0.90 wt%. The straight line with  $\varphi_c = 0.68$  wt% gives the best fit to the experimental data (Figure 6 inset), so the  $\varphi_c$  of the PLLA/TPU-1.5CNTs composites is considered as 0.68 wt%. The slope of the fitted straight line represents the value of  $t$  and was estimated to be 2.94. The intercept with the ordinate yields  $\log \sigma_0$ .

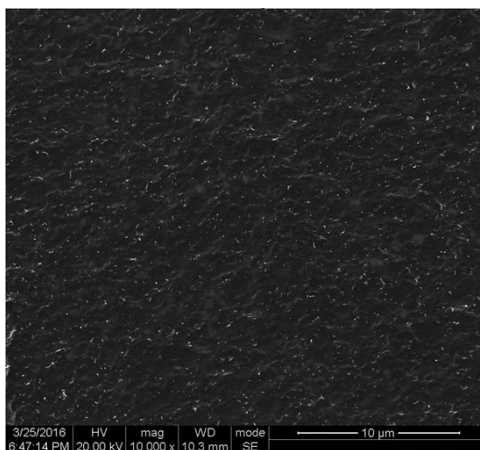

**Figure S1.** SEM image showing the morphological structure of TPU-1.5CNTs composite.
